# Supplementary material for: An efficient and stable fluorescent sensor based on APTES-functionalized CsPbBr3 perovskite quantum dots for ultrasensitive tetracycline detection in ethanol
Source: Royal Society of Chemistry journal article supplement (doi:10.1039/d0tc02852e), 2020-01-01
Supplement: d0tc02852e1.pdf [file d0tc02852e1.pdf]

## Supporting information

# Efficient and stable fluorescence sensor based on APTES-functionalized CsPbBr<sub>3</sub> perovskite quantum dots for ultrasensitive tetracycline detection in ethanol

Tong Wang,<sup>a, b, 1</sup> Xiao Wei,<sup>a, b, 1\*</sup> Yuhang Zong,<sup>a, b</sup> Shen Zhang,<sup>a, b</sup> Weisheng Guan,<sup>a, b</sup>

<sup>a</sup>Key Laboratory of Subsurface Hydrology and Ecological Effects in Arid Region, Ministry of Education, Chang'an University, Xi'an 710054, China

<sup>b</sup>School of Water and Environment, Chang'an University, Xi'an 710054, China

\*Corresponding author: Tel: +86 029 82339956; Fax: +86 029 82339281; E-mail address: chdwx@chd.edu.cn (X. Wei).

<sup>1</sup>These authors contributed equally to this work

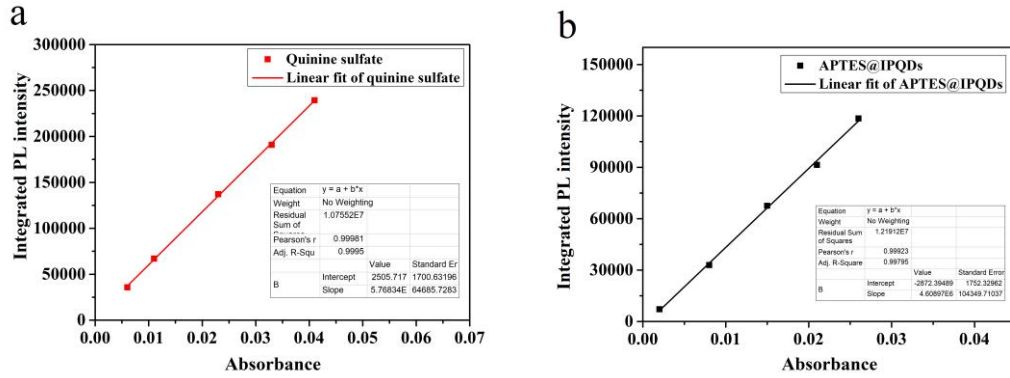

Fig. S1. The fitting diagrams of the absorbance value at the excitation wavelength and the integral of the emission wavelength spectrum of the standard solution (a) and APTES@IPQDs (b) respectively.

The fluorescence quantum yield of APTES@IPQDs was calculated by the following formula:

$$\Phi_{sample} = \Phi_{standard} \cdot \frac{K_{sample}}{K_{standard}} \cdot \frac{n_{sample}^2}{n_{standard}^2}$$

Herein,  $\Phi$  is the fluorescence quantum yield, K is the slope from Fig. S1, and n is the refractive index of the solvent used. The quinine sulfate in 0.1 M H<sub>2</sub>SO<sub>4</sub> excited at 360 nm was selected as the standard solution for APTES@IPQDs, and its  $\Phi_F$  was 0.56. Based on this method, the calculated quantum yield of APTES@IPQDs was 46.86%.

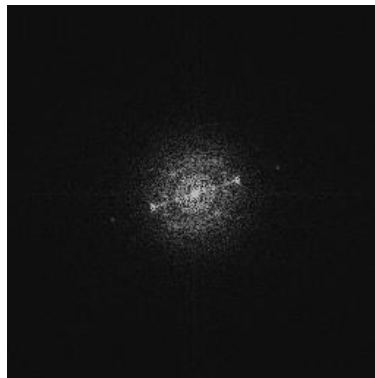

Fig. S2. The corresponding FFT pattern of APTES@IPQDs

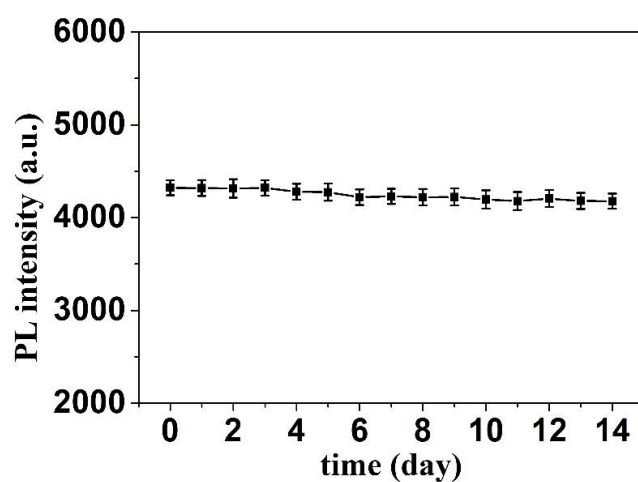

Fig. S3. The stability of APTES@IPQDs in two weeks

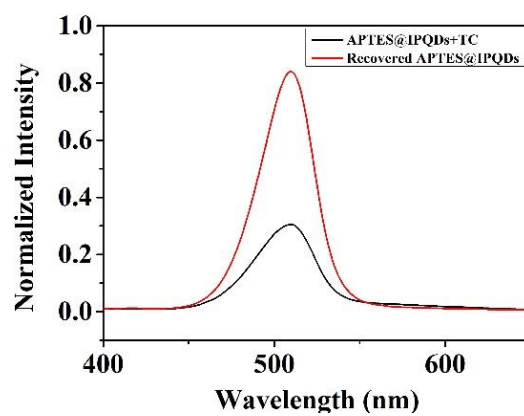

Fig. S4. Fluorescence spectra of APTES@IPQDs with TC (8.0  $\mu$ M) and the recovered APTES@IPQDs

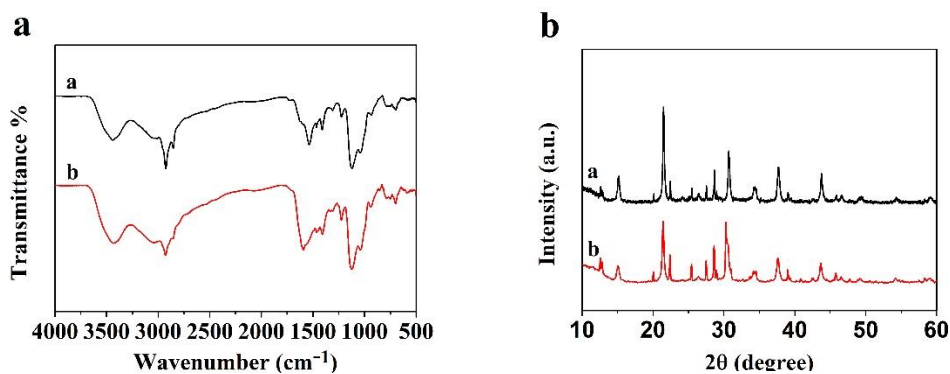

Fig. S5. The FT-IR spectra (a) and XRD patterns (b) of APTES@IPQDs and recovered APTES@IPQDs (the black line (a) represents the APTES@IPQDs, the red line (b) represents the recovered APTES@IPQDs).

Table S1. Specific statistics of the XPS survey for APTES@IPQDs.

| Name | Peak<br>BE | Hight<br>CPS | FWHM<br>eV | Area (P)<br>CPS.eV | Area (N)<br>TPP-2M | Atomic<br>% |
|------|------------|--------------|------------|--------------------|--------------------|-------------|
| Cs3d | 723.84     | 76651.16     | 1.23       | 208065.09          | 0.11               | 5.81        |
| Pb4f | 138.19     | 70520.81     | 1          | 145531.41          | 0.1                | 5.08        |
| Br3d | 68.26      | 27176.73     | 1.18       | 47929.39           | 0.38               | 20.31       |

Table S2. Comparison of LOD with other reported methods for the detection of TC.

| method                        | LOD ( $\mu\text{M}$ ) | Solvent | References |
|-------------------------------|-----------------------|---------|------------|
| silver nanoparticles          | 29                    | water   | [S1]       |
| CdTe quantum dots             | 2.1                   | water   | [S2]       |
| ZnO nanorods                  | 1.27                  | water   | [S3]       |
| Carbon dots                   | 0.165                 | water   | [S4]       |
| Eu-Carbon dots                | 0.3                   | water   | [S5]       |
| MoS <sub>2</sub> quantum dots | 0.1                   | water   | [S6]       |
| Red/Green CdTe QDs            | 0.35                  | water   | [S7]       |
| APTES@IPQDs                   | 0.076                 | ethanol | This work  |

Table S3. Fitting parameters of the PL decay curves.

|                                | $\tau_1$ (ns) | $\tau_2$ (ns) | $A_1$   | $A_2$   | $\tau_{ave}$ (ns) | $\chi^2$ (%) |
|--------------------------------|---------------|---------------|---------|---------|-------------------|--------------|
| APTES@IPQDs with 0 $\mu$ M TC  | 19.76         | 115.92        | 2693.99 | 1449.52 | 92.78             | 1.284        |
| APTES@IPQDs with 10 $\mu$ M TC | 19.47         | 100.55        | 2859.73 | 1144.83 | 74.12             | 1.267        |
| APTES@IPQDs with 15 $\mu$ M TC | 18.38         | 90.52         | 2133.82 | 639.37  | 61.38             | 1.256        |

#### The measurements of time-resolved decay

In order to determine the fluorescence quenching mechanism, the fluorescence decay curves of APTES@IPQDs with different concentrations of TC were recorded separately. The pulsed excitation light was 375 nm, and emission wavelength was 512 nm. All the decay curves were fitted by biexponential fit model:

$$I(t) = A_1 e^{(-t/\tau_1)} + A_2 e^{(-t/\tau_2)}$$

The average lifetimes of APTES@IPQDs were evaluated by the following formula:

$$\tau_{ave} = \frac{(A_1 \tau_1^2 + A_2 \tau_2^2)}{(A_1 \tau_1 + A_2 \tau_2)}$$

Table S4. Recovery of TC in the spiked soil samples at different concentrations (n=4).

| sample | Concentration taken ( $\mu$ M) | Found ( $\mu$ M) | Recovery (%) | RSD (%) |
|--------|--------------------------------|------------------|--------------|---------|
| 1      | 0.5                            | 0.466            | 93.2         | 5.4     |
| 2      | 1.0                            | 1.077            | 107.7        | 3.3     |
| 3      | 4.0                            | 3.788            | 94.7         | 2.7     |
| 4      | 7.0                            | 7.331            | 104.7        | 4.1     |
| 5      | 10.0                           | 9.818            | 98.18        | 3.5     |

#### supplementary material references:

- [S1] M. Amjadi, J. L. Manzoori, F. Pakpoor, *J. Anal. Chem.*, 2016, **71**, 253-258.  
[S2] M. Chao, C. Hu, J. Chen, *Anal. Chim. Acta*, 2016, **925**, 61-69.  
[S3] Z. Zhou, K. Lu, X. Wei, T. Hao, Y. Xu, X. Lv, Y. Zhang, *RSC Adv.*, 2016, **6**, 10-1039.  
[S4] D. Uriarte, C. Domini, M. Garrido, *Talanta*, 2019, **201**, 143-148.  
[S5] M. L. Liu, B. B. Chen, T. Yang, J. Wang, X. D. Liu, C. Z. Huang, *Methods Appl. Fluores.*, 2017, **5**, 15003.

- [S6] H. Huang, C. Du, H. Shi, X. Feng, J. Li, Y. Tan, W. Song, *Part. Part. Syst. Char.*, 2015, **32**, 72-79.
- [S7] X. Wei and H. Chen, *Anal. Bioanal. Chem.*, 2019, **411**, 5809-5816.
